# Supplementary material for: MicroRNA Profiling in Mucosal Biopsies of Eosinophilic Esophagitis Patients Pre and Post Treatment with Steroids and Relationship with mRNA Targets
Source: PLoS One. 2012 Jul 16;7(7):e40676. doi: 10.1371/journal.pone.0040676 (PMC3398046; doi:10.1371/journal.pone.0040676)
Supplement: Table S1 — The full list of 346 differentially regulated mRNAs targeted by differentially regulated miRNAs. (XLS) [file pone.0040676.s001.xls]

## Sheet: Sheet0
miRNA ID	Target Site	p-value (miRNA)	miRNA Fold Change (Pre- vs Post-treatment)	Source	Confidence	mRNA ID	IPA Symbol	p-value (mRNA)	mRNA Fold Change (Pre- vs Post-treatment)	IPA Pathway
hsa-miR-214	miR-761/miR-214/miR-3619-5p	0.0194	151.456	TargetScan Human	High (predicted)	ABLIM3	ABLIM3	5.73e-05	-5.083	Axonal Guidance Signaling
hsa-miR-214	miR-761/miR-214/miR-3619-5p	0.0194	151.456	TargetScan Human	High (predicted)	ARHGAP10	ARHGAP10	0.000863	-2.444	PAK Signaling
hsa-miR-214	miR-761/miR-214/miR-3619-5p	0.0194	151.456	TargetScan Human	High (predicted)	CAPN5	CAPN5	0.000911	-2.069	Amyloid Processing,Amyotrophic Lateral Sclerosis Signaling,Apoptosis Signaling,FAK Signaling,Huntington's Disease Signaling,Integrin Signaling
hsa-miR-214	miR-761/miR-214/miR-3619-5p	0.0194	151.456	TargetScan Human	High (predicted)	CPEB4	CPEB4	0.000924	-2.334
hsa-miR-214	miR-761/miR-214/miR-3619-5p	0.0194	151.456	TargetScan Human	High (predicted)	DOCK9	DOCK9	9.48e-05	-2.737
hsa-miR-214	miR-761/miR-214/miR-3619-5p	0.0194	151.456	TargetScan Human	High (predicted)	KIF1B	KIF1B	0.000514	-2.011	Purine Metabolism
hsa-miR-214	miR-761/miR-214/miR-3619-5p	0.0194	151.456	TargetScan Human	High (predicted)	PIM1	PIM1	4.34e-05	-2.442	Acute Myeloid Leukemia Signaling,GM-CSF Signaling,Inositol Phosphate Metabolism,Nicotinate and Nicotinamide Metabolism
hsa-miR-214	miR-761/miR-214/miR-3619-5p	0.0194	151.456	TargetScan Human	High (predicted)	RAB5B	RAB5B	0.000767	-2.099	Amyotrophic Lateral Sclerosis Signaling,Caveolar-mediated Endocytosis Signaling,Clathrin-mediated Endocytosis Signaling
hsa-miR-214	miR-761/miR-214/miR-3619-5p	0.0194	151.456	TargetScan Human	High (predicted)	RNF169	RNF169	0.000798	-2.004
hsa-miR-214	miR-761/miR-214/miR-3619-5p	0.0194	151.456	TargetScan Human	High (predicted)	TRPS1	TRPS1	0.000129	-2.391
hsa-miR-214	miR-761/miR-214/miR-3619-5p	0.0194	151.456	TargetScan Human	High (predicted)	TWF1	TWF1 (includes EG:19230)	0.000395	-2.028	IL-15 Production
hsa-miR-146a	miR-146a/miR-146b/miR-146b-5p	0.000449	39.218	TargetScan Human	High (predicted)	CCDC6	CCDC6	1.88e-05	-2.379
hsa-miR-146a	miR-146a/miR-146b/miR-146b-5p	0.000449	39.218	Ingenuity Expert Findings	Experimentally Observed	IL1RAP	IL1RAP	7.96e-05	-2.101	Acute Phase Response Signaling,Hepatic Cholestasis,Hepatic Fibrosis / Hepatic Stellate Cell Activation,IL-1 Signaling,IL-10 Signaling,IL-6 Signaling,LPS/IL-1 Mediated Inhibition of RXR Function,LXR/RXR Activation
hsa-miR-146a	miR-146a/miR-146b/miR-146b-5p	0.000449	39.218	Ingenuity Expert Findings	Experimentally Observed	IL1RL2	IL1RL2	0.000435	-2.1	Hepatic Cholestasis,Hepatic Fibrosis / Hepatic Stellate Cell Activation,IL-10 Signaling,IL-6 Signaling,LPS/IL-1 Mediated Inhibition of RXR Function,LXR/RXR Activation,PPAR Signaling,PPARα/RXRα Activation
hsa-miR-146a	miR-146a/miR-146b/miR-146b-5p	0.000449	39.218	TargetScan Human	High (predicted)	MYO6	MYO6	0.000321	-2.551	Clathrin-mediated Endocytosis Signaling
hsa-miR-146a	miR-146a/miR-146b/miR-146b-5p	0.000449	39.218	Ingenuity Expert Findings	Experimentally Observed	S100A12	S100A12	0.000141	-6.703
hsa-miR-146a	miR-146a/miR-146b/miR-146b-5p	0.000449	39.218	TargetScan Human	High (predicted)	ZNF117	ZNF117	0.000291	-2.812
hsa-miR-145	miR-145	0.0277	35.954	TargetScan Human	High (predicted)	ACTG1	ACTG1	0.000274	-2.218	Actin Cytoskeleton Signaling,Agrin Interactions at Neuromuscular Junction,Caveolar-mediated Endocytosis Signaling,Cellular Effects of Sildenafil (Viagra),Clathrin-mediated Endocytosis Signaling,Crosstalk between Dendritic Cells and Natural Killer Cells,FAK Signaling,Fcγ Receptor-mediated Phagocytosis in Macrophages and Monocytes
hsa-miR-145	miR-145	0.0277	35.954	TargetScan Human	High (predicted)	AIM1	AIM1 (includes EG:11630)	0.00048	-2.985
hsa-miR-145	miR-145	0.0277	35.954	TargetScan Human	High (predicted)	BNIP3	BNIP3	0.000231	-5.576
hsa-miR-145	miR-145	0.0277	35.954	TargetScan Human	High (predicted)	C15orf29	C15orf29	5.62e-05	-2.625
hsa-miR-145	miR-145	0.0277	35.954	TargetScan Human	High (predicted)	CHP	CHP	0.000591	-2.474	Axonal Guidance Signaling,CD28 Signaling in T Helper Cells,Calcium Signaling,Calcium-induced T Lymphocyte Apoptosis,Cardiac Hypertrophy Signaling,Clathrin-mediated Endocytosis Signaling,Dopamine-DARPP32 Feedback in cAMP Signaling,Glucocorticoid Receptor Signaling
hsa-miR-145	miR-145	0.0277	35.954	TargetScan Human	High (predicted)	CITED2	CITED2	0.000422	-2.216	PPAR Signaling,RAR Activation,Xenobiotic Metabolism Signaling
hsa-miR-145	miR-145	0.0277	35.954	TargetScan Human	High (predicted)	DOCK9	DOCK9	9.48e-05	-2.737
hsa-miR-145	miR-145	0.0277	35.954	TargetScan Human	High (predicted)	EPB41L4A	EPB41L4A	1.74e-06	-2.153
hsa-miR-145	miR-145	0.0277	35.954	TargetScan Human	High (predicted)	FAM45A	FAM45A	0.000212	-2.526
hsa-miR-145	miR-145	0.0277	35.954	TargetScan Human	High (predicted)	FBXO34	FBXO34	0.000227	-2.804
hsa-miR-145	miR-145	0.0277	35.954	TargetScan Human	High (predicted)	GABARAPL2	GABARAPL2	0.000366	-2.114
hsa-miR-145	miR-145	0.0277	35.954	TargetScan Human	High (predicted)	KIAA1370	KIAA1370	0.00038	-2.405
hsa-miR-145	miR-145	0.0277	35.954	TargetScan Human	High (predicted)	KIF21A	KIF21A	0.00102	-3.883
hsa-miR-145	miR-145	0.0277	35.954	miRecords	Experimentally Observed	KRT7	KRT7	8.21e-06	-2.694
hsa-miR-145	miR-145	0.0277	35.954	TargetScan Human	High (predicted)	MYO6	MYO6	0.000321	-2.551	Clathrin-mediated Endocytosis Signaling
hsa-miR-145	miR-145	0.0277	35.954	Ingenuity Expert Findings	Experimentally Observed	PADI1	PADI1	0.000451	-6.968
hsa-miR-145	miR-145	0.0277	35.954	TargetScan Human	High (predicted)	PHACTR2	PHACTR2	4.74e-05	-4.488
hsa-miR-145	miR-145	0.0277	35.954	TargetScan Human	High (predicted)	PHACTR4	PHACTR4	0.000498	-2.893
hsa-miR-145	miR-145	0.0277	35.954	TargetScan Human	High (predicted)	PSD3	PSD3	0.000486	-2.347
hsa-miR-145	miR-145	0.0277	35.954	TargetScan Human	High (predicted)	PTPN3	PTPN3	0.0012	-2.244
hsa-miR-145	miR-145	0.0277	35.954	TargetScan Human	High (predicted)	RNF169	RNF169	0.000798	-2.004
hsa-miR-145	miR-145	0.0277	35.954	TargetScan Human	High (predicted)	SAMD5	SAMD5	0.000277	-3.243
hsa-miR-145	miR-145	0.0277	35.954	TargetScan Human	High (predicted)	SNX24	SNX24	0.000173	-3.988
hsa-miR-145	miR-145	0.0277	35.954	TargetScan Human	High (predicted)	SRGAP1	SRGAP1	0.000434	-3.206	Axonal Guidance Signaling
hsa-miR-145	miR-145	0.0277	35.954	TargetScan Human	High (predicted)	TMOD3	TMOD3	0.000113	-3.039
hsa-miR-145	miR-145	0.0277	35.954	TargetScan Human	High (predicted)	TSPAN6	TSPAN6	0.00116	-3.623	Integrin Signaling
hsa-miR-145	miR-145	0.0277	35.954	TargetScan Human	High (predicted)	UBL3	UBL3	0.000443	-2.899
hsa-miR-142-3p	miR-142-3p	0.00172	26.546	TargetScan Human	High (predicted)	C18orf25	C18orf25	0.000632	-2.861
hsa-miR-142-3p	miR-142-3p	0.00172	26.546	TargetScan Human	High (predicted)	C1orf9	C1orf9	0.000449	-2.003
hsa-miR-142-3p	miR-142-3p	0.00172	26.546	TargetScan Human	High (predicted)	CCDC6	CCDC6	1.88e-05	-2.379
hsa-miR-142-3p	miR-142-3p	0.00172	26.546	TargetScan Human	High (predicted)	HECTD1	HECTD1	0.000523	-2.158
hsa-miR-142-3p	miR-142-3p	0.00172	26.546	TargetScan Human	High (predicted)	KAT2B	KAT2B	0.00108	-2.151	AMPK Signaling,Androgen Signaling,Cell Cycle: G2/M DNA Damage Checkpoint Regulation,Estrogen Receptor Signaling,Glucocorticoid Receptor Signaling,HMGB1 Signaling,Lysine Degradation,RAR Activation
hsa-miR-142-3p	miR-142-3p	0.00172	26.546	TargetScan Human	High (predicted)	MGLL	MGLL	6.76e-07	-3.001	Glycerolipid Metabolism,Glycerophospholipid Metabolism,Phospholipid Degradation
hsa-miR-142-3p	miR-142-3p	0.00172	26.546	TargetScan Human	High (predicted)	RAB2A	RAB2A	5.11e-05	-2.297
hsa-miR-142-3p	miR-142-3p	0.00172	26.546	TargetScan Human	High (predicted)	TIPARP	TIPARP	0.000461	-2.165	Retinoic acid Mediated Apoptosis Signaling
hsa-miR-142-3p	miR-142-3p	0.00172	26.546	TargetScan Human	High (predicted)	TWF1	TWF1 (includes EG:19230)	0.000395	-2.028	IL-15 Production
hsa-miR-142-3p	miR-142-3p	0.00172	26.546	TargetScan Human	High (predicted)	USP6NL	USP6NL	0.000135	-2.474	Macropinocytosis Signaling
hsa-miR-142-3p	miR-142-3p	0.00172	26.546	TargetScan Human	High (predicted)	WASL	WASL	0.000247	-2.121	Actin Cytoskeleton Signaling,Actin Nucleation by ARP-WASP Complex,Axonal Guidance Signaling,Cdc42 Signaling,Clathrin-mediated Endocytosis Signaling,Ephrin Receptor Signaling,Germ Cell-Sertoli Cell Junction Signaling,Integrin Signaling
hsa-miR-21	miR-21/miR-590-5p	0.000995	11.512	miRecords	Experimentally Observed	HIPK3	HIPK3	0.000357	-2.032
hsa-miR-21	miR-21/miR-590-5p	0.000995	11.512	TargetScan Human	High (predicted)	IL12A	IL12A	4.95e-05	-6.249	Altered T Cell and B Cell Signaling in Rheumatoid Arthritis,Communication between Innate and Adaptive Immune Cells,Crosstalk between Dendritic Cells and Natural Killer Cells,Dendritic Cell Maturation,Differential Regulation of Cytokine Production in Intestinal Epithelial Cells by IL-17A and IL-17F,Differential Regulation of Cytokine Production in Macrophages and T Helper Cells by IL-17A and IL-17…
hsa-miR-21	miR-21/miR-590-5p	0.000995	11.512	TargetScan Human,miRecords	Experimentally Observed,High (predicted)	PELI1	PELI1	0.000328	-3.125
hsa-miR-21	miR-21/miR-590-5p	0.000995	11.512	TargetScan Human	High (predicted)	RFFL	RFFL	0.000163	-2.025
hsa-miR-21	miR-21/miR-590-5p	0.000995	11.512	TargetScan Human	High (predicted)	RMND5A	RMND5A	0.000414	-4.82
hsa-miR-21	miR-21/miR-590-5p	0.000995	11.512	TargetScan Human	High (predicted)	SASH1	SASH1	0.000247	-3.585
hsa-miR-21	miR-21/miR-590-5p	0.000995	11.512	TargetScan Human	High (predicted)	SECISBP2L	SECISBP2L	0.00101	-2.234
hsa-miR-21	miR-21/miR-590-5p	0.000995	11.512	TargetScan Human	High (predicted)	TIAM1	TIAM1	7.97e-05	-2.003	Actin Cytoskeleton Signaling,Rac Signaling,Tight Junction Signaling
hsa-miR-21	miR-21/miR-590-5p	0.000995	11.512	TargetScan Human	High (predicted)	TOR1AIP2	TOR1AIP2	4.9e-05	-2.282
hsa-miR-10a	miR-10a/miR-10b/miR-10a-5p	0.0484	6.703	TargetScan Human	High (predicted)	ACTG1	ACTG1	0.000274	-2.218	Actin Cytoskeleton Signaling,Agrin Interactions at Neuromuscular Junction,Caveolar-mediated Endocytosis Signaling,Cellular Effects of Sildenafil (Viagra),Clathrin-mediated Endocytosis Signaling,Crosstalk between Dendritic Cells and Natural Killer Cells,FAK Signaling,Fcγ Receptor-mediated Phagocytosis in Macrophages and Monocytes
hsa-miR-10a	miR-10a/miR-10b/miR-10a-5p	0.0484	6.703	TargetScan Human	High (predicted)	CNST	CNST	0.000207	-2.424
hsa-miR-10a	miR-10a/miR-10b/miR-10a-5p	0.0484	6.703	TargetScan Human	High (predicted)	RAP2A	RAP2A	1.09e-05	-2.399	Calcium Signaling,Integrin Signaling,Molecular Mechanisms of Cancer
hsa-miR-10a	miR-10a/miR-10b/miR-10a-5p	0.0484	6.703	TargetScan Human	High (predicted)	TIAM1	TIAM1	7.97e-05	-2.003	Actin Cytoskeleton Signaling,Rac Signaling,Tight Junction Signaling
hsa-miR-10a	miR-10a/miR-10b/miR-10a-5p	0.0484	6.703	TargetScan Human	High (predicted)	ZFAND5	ZFAND5	0.000282	-2.78
hsa-miR-223	miR-223	0.00277	5.443	TargetScan Human	High (predicted)	CDS1	CDS1	0.000287	-2.404	Aminophosphonate Metabolism,Glycerophospholipid Metabolism
hsa-miR-223	miR-223	0.00277	5.443	TargetScan Human	High (predicted)	SC4MOL	MSMO1	0.000226	-3.329
hsa-miR-223	miR-223	0.00277	5.443	TargetScan Human	High (predicted)	NAMPT	NAMPT	0.00112	-4.009	Nicotinate and Nicotinamide Metabolism
hsa-miR-223	miR-223	0.00277	5.443	TargetScan Human	High (predicted)	PRDM1	PRDM1	0.000631	-2.592
hsa-miR-223	miR-223	0.00277	5.443	TargetScan Human	High (predicted)	SECISBP2L	SECISBP2L	0.00101	-2.234
hsa-miR-223	miR-223	0.00277	5.443	TargetScan Human	High (predicted)	SNX24	SNX24	0.000173	-3.988
hsa-miR-223	miR-223	0.00277	5.443	TargetScan Human	High (predicted)	TWF1	TWF1 (includes EG:19230)	0.000395	-2.028	IL-15 Production
hsa-miR-223	miR-223	0.00277	5.443	TargetScan Human	High (predicted)	ZNF365	ZNF365	0.000347	-2.024
hsa-miR-324-5p	miR-324-5p	0.0141	5.343	TargetScan Human	High (predicted)	RNF169	RNF169	0.000798	-2.004
hsa-miR-324-5p	miR-324-5p	0.0141	5.343	TargetScan Human	High (predicted)	TRPS1	TRPS1	0.000129	-2.391
hsa-miR-324-5p	miR-324-5p	0.0141	5.343	TargetScan Human	High (predicted)	USP6NL	USP6NL	0.000135	-2.474	Macropinocytosis Signaling
hsa-miR-324-5p	miR-324-5p	0.0141	5.343	TargetScan Human	High (predicted)	ZNF185	ZNF185	0.00028	-3.256
hsa-miR-99a	miR-100/miR-99a/miR-99b	0.0238	5.203	TargetScan Human	High (predicted)	GRHL1	GRHL1	0.000426	-2.584
hsa-miR-99a	miR-100/miR-99a/miR-99b	0.0238	5.203	TargetScan Human	High (predicted)	PPP1CB	PPP1CB	0.000776	-2.18	Actin Cytoskeleton Signaling,Breast Cancer Regulation by Stathmin1,CCR3 Signaling in Eosinophils,CDK5 Signaling,Cardiac β-adrenergic Signaling,Cdc42 Signaling,Cellular Effects of Sildenafil (Viagra),Chemokine Signaling
hsa-miR-34a	miR-449a/miR-34a/miR-34c (includes others)	0.0299	4.993	TargetScan Human	High (predicted)	ABLIM1	ABLIM1	4.18e-05	-2.916	Axonal Guidance Signaling
hsa-miR-34a	miR-449a/miR-34a/miR-34c (includes others)	0.0299	4.993	TargetScan Human	High (predicted)	AREG	AREG/AREGB	0.0004	-2.323	HER-2 Signaling in Breast Cancer,Neuregulin Signaling
hsa-miR-34a	miR-449a/miR-34a/miR-34c (includes others)	0.0299	4.993	TargetScan Human	High (predicted)	CLOCK	CLOCK	0.000892	-2.62	Circadian Rhythm Signaling,PPARα/RXRα Activation
hsa-miR-34a	miR-449a/miR-34a/miR-34c (includes others)	0.0299	4.993	TargetScan Human	High (predicted)	DOCK3	DOCK3	0.000236	-2.141
hsa-miR-34a	miR-449a/miR-34a/miR-34c (includes others)	0.0299	4.993	TargetScan Human	High (predicted)	MARCH5	MARCH5	0.000956	-2.142
hsa-miR-34a	miR-449a/miR-34a/miR-34c (includes others)	0.0299	4.993	TargetScan Human	High (predicted)	NCOA1	NCOA1	0.000435	-2.563	Androgen Signaling,Estrogen Receptor Signaling,Glucocorticoid Receptor Signaling,HIF1α Signaling,IL-12 Signaling and Production in Macrophages,PPAR Signaling,PXR/RXR Activation,RAR Activation
hsa-miR-34a	miR-449a/miR-34a/miR-34c (includes others)	0.0299	4.993	TargetScan Human	High (predicted)	PEA15	PEA15	0.00073	-2.175
hsa-miR-34a	miR-449a/miR-34a/miR-34c (includes others)	0.0299	4.993	TargetScan Human	High (predicted)	RNF169	RNF169	0.000798	-2.004
hsa-miR-34a	miR-449a/miR-34a/miR-34c (includes others)	0.0299	4.993	TargetScan Human	High (predicted)	TOM1	TOM1 (includes EG:10043)	6.27e-06	-2.672
hsa-miR-195	miR-16/miR-497/miR-195 (includes others)	0.00412	4.868	TargetScan Human	High (predicted)	ABTB2	ABTB2	3.92e-05	-2.69
hsa-miR-195	miR-16/miR-497/miR-195 (includes others)	0.00412	4.868	TargetScan Human	High (predicted)	AHNAK2	AHNAK2	0.00104	-2.733
hsa-miR-195	miR-16/miR-497/miR-195 (includes others)	0.00412	4.868	TargetScan Human	High (predicted)	AK4	AK4	0.0012	-2.524	AMPK Signaling,Purine Metabolism,Pyrimidine Metabolism
hsa-miR-195	miR-16/miR-497/miR-195 (includes others)	0.00412	4.868	TargetScan Human	High (predicted)	ALOX12	ALOX12	3.44e-05	-8.647	Arachidonic Acid Metabolism,Atherosclerosis Signaling,Eicosanoid Signaling,IL-12 Signaling and Production in Macrophages,Linoleic Acid Metabolism
hsa-miR-195	miR-16/miR-497/miR-195 (includes others)	0.00412	4.868	TargetScan Human	High (predicted)	B4GALT1	B4GALT1	0.000986	-2.59	Galactose Metabolism,Keratan Sulfate Biosynthesis,N-Glycan Biosynthesis
hsa-miR-195	miR-16/miR-497/miR-195 (includes others)	0.00412	4.868	TargetScan Human	High (predicted)	C1orf9	C1orf9	0.000449	-2.003
hsa-miR-195	miR-16/miR-497/miR-195 (includes others)	0.00412	4.868	TargetScan Human	High (predicted)	CAB39	CAB39	0.000631	-2.296	AMPK Signaling
hsa-miR-195	miR-16/miR-497/miR-195 (includes others)	0.00412	4.868	TargetScan Human	High (predicted)	CCDC6	CCDC6	1.88e-05	-2.379
hsa-miR-195	miR-16/miR-497/miR-195 (includes others)	0.00412	4.868	TargetScan Human	High (predicted)	CGNL1	CGNL1	0.000366	-3.948
hsa-miR-195	miR-16/miR-497/miR-195 (includes others)	0.00412	4.868	TargetScan Human	High (predicted)	CLOCK	CLOCK	0.000892	-2.62	Circadian Rhythm Signaling,PPARα/RXRα Activation
hsa-miR-195	miR-16/miR-497/miR-195 (includes others)	0.00412	4.868	TargetScan Human	High (predicted)	ELMO2	ELMO2	0.000697	-2.029	CXCR4 Signaling
hsa-miR-195	miR-16/miR-497/miR-195 (includes others)	0.00412	4.868	TargetScan Human	High (predicted)	ESRP1	ESRP1	0.000287	-2.298
hsa-miR-195	miR-16/miR-497/miR-195 (includes others)	0.00412	4.868	TargetScan Human	High (predicted)	FAM59A	FAM59A	2.49e-05	-2.199
hsa-miR-195	miR-16/miR-497/miR-195 (includes others)	0.00412	4.868	TargetScan Human	High (predicted)	HECTD1	HECTD1	0.000523	-2.158
hsa-miR-195	miR-16/miR-497/miR-195 (includes others)	0.00412	4.868	TargetScan Human	High (predicted)	KIF1B	KIF1B	0.000514	-2.011	Purine Metabolism
hsa-miR-195	miR-16/miR-497/miR-195 (includes others)	0.00412	4.868	TargetScan Human	High (predicted)	KIF21A	KIF21A	0.00102	-3.883
hsa-miR-195	miR-16/miR-497/miR-195 (includes others)	0.00412	4.868	TargetScan Human	High (predicted)	MARCH5	MARCH5	0.000956	-2.142
hsa-miR-195	miR-16/miR-497/miR-195 (includes others)	0.00412	4.868	TargetScan Human	High (predicted)	PDIA6	PDIA6	0.000367	-3.014
hsa-miR-195	miR-16/miR-497/miR-195 (includes others)	0.00412	4.868	TargetScan Human	High (predicted)	PHACTR2	PHACTR2	4.74e-05	-4.488
hsa-miR-195	miR-16/miR-497/miR-195 (includes others)	0.00412	4.868	TargetScan Human	High (predicted)	PIM1	PIM1	4.34e-05	-2.442	Acute Myeloid Leukemia Signaling,GM-CSF Signaling,Inositol Phosphate Metabolism,Nicotinate and Nicotinamide Metabolism
hsa-miR-195	miR-16/miR-497/miR-195 (includes others)	0.00412	4.868	TargetScan Human	High (predicted)	PTPN3	PTPN3	0.0012	-2.244
hsa-miR-195	miR-16/miR-497/miR-195 (includes others)	0.00412	4.868	TargetScan Human	High (predicted)	RASGEF1B	RASGEF1B	0.000316	-3.167
hsa-miR-195	miR-16/miR-497/miR-195 (includes others)	0.00412	4.868	TargetScan Human	High (predicted)	SNX16	SNX16	0.00123	-2.99
hsa-miR-195	miR-16/miR-497/miR-195 (includes others)	0.00412	4.868	TarBase,TargetScan Human	Experimentally Observed,High (predicted)	SPTLC1	SPTLC1	0.000246	-2.443	Sphingolipid Metabolism
hsa-miR-195	miR-16/miR-497/miR-195 (includes others)	0.00412	4.868	TargetScan Human	High (predicted)	STRADB	STRADB	4.78e-05	-3.877
hsa-miR-195	miR-16/miR-497/miR-195 (includes others)	0.00412	4.868	TargetScan Human	High (predicted)	TAB3	TAB3	9.2e-07	-2.083	NF-κB Signaling
hsa-miR-195	miR-16/miR-497/miR-195 (includes others)	0.00412	4.868	TargetScan Human	High (predicted)	TMEM154	TMEM154	0.000878	-2.483
hsa-miR-195	miR-16/miR-497/miR-195 (includes others)	0.00412	4.868	TargetScan Human	High (predicted)	TRIP10	TRIP10	0.00049	-2.922	Insulin Receptor Signaling
hsa-miR-195	miR-16/miR-497/miR-195 (includes others)	0.00412	4.868	TargetScan Human	High (predicted)	TUFT1	TUFT1	0.000284	-3.082
hsa-miR-195	miR-16/miR-497/miR-195 (includes others)	0.00412	4.868	TargetScan Human	High (predicted)	UBL3	UBL3	0.000443	-2.899
hsa-miR-195	miR-16/miR-497/miR-195 (includes others)	0.00412	4.868	TargetScan Human	High (predicted)	WASL	WASL	0.000247	-2.121	Actin Cytoskeleton Signaling,Actin Nucleation by ARP-WASP Complex,Axonal Guidance Signaling,Cdc42 Signaling,Clathrin-mediated Endocytosis Signaling,Ephrin Receptor Signaling,Germ Cell-Sertoli Cell Junction Signaling,Integrin Signaling
hsa-miR-125a-5p	miR-125b-5p/miR-125a-5p/miR-125b (includes others)	0.0188	4.748	TargetScan Human	High (predicted)	B4GALT1	B4GALT1	0.000986	-2.59	Galactose Metabolism,Keratan Sulfate Biosynthesis,N-Glycan Biosynthesis
hsa-miR-125a-5p	miR-125b-5p/miR-125a-5p/miR-125b (includes others)	0.0188	4.748	TargetScan Human	High (predicted)	DOCK3	DOCK3	0.000236	-2.141
hsa-miR-125a-5p	miR-125b-5p/miR-125a-5p/miR-125b (includes others)	0.0188	4.748	TargetScan Human	High (predicted)	ETNK2	ETNK2	7.72e-05	-4.884
hsa-miR-125a-5p	miR-125b-5p/miR-125a-5p/miR-125b (includes others)	0.0188	4.748	TargetScan Human	High (predicted)	FAM129B	FAM129B	0.000979	-2.389
hsa-miR-125a-5p	miR-125b-5p/miR-125a-5p/miR-125b (includes others)	0.0188	4.748	TargetScan Human	High (predicted)	GRHL1	GRHL1	0.000426	-2.584
hsa-miR-125a-5p	miR-125b-5p/miR-125a-5p/miR-125b (includes others)	0.0188	4.748	miRecords	Experimentally Observed	IL1RN	IL1RN	0.000263	-3.161	Acute Phase Response Signaling,Altered T Cell and B Cell Signaling in Rheumatoid Arthritis,Atherosclerosis Signaling,Cholecystokinin/Gastrin-mediated Signaling,Communication between Innate and Adaptive Immune Cells,Dendritic Cell Maturation,FXR/RXR Activation,Glucocorticoid Receptor Signaling
hsa-miR-125a-5p	miR-125b-5p/miR-125a-5p/miR-125b (includes others)	0.0188	4.748	TargetScan Human	High (predicted)	MEGF9	MEGF9	9e-05	-2.078
hsa-miR-125a-5p	miR-125b-5p/miR-125a-5p/miR-125b (includes others)	0.0188	4.748	TargetScan Human	High (predicted)	PRDM1	PRDM1	0.000631	-2.592
hsa-miR-125a-5p	miR-125b-5p/miR-125a-5p/miR-125b (includes others)	0.0188	4.748	TargetScan Human	High (predicted)	RIT1	RIT1 (includes EG:19769)	0.000663	-2.272
hsa-miR-125a-5p	miR-125b-5p/miR-125a-5p/miR-125b (includes others)	0.0188	4.748	TargetScan Human	High (predicted)	TRPS1	TRPS1	0.000129	-2.391
hsa-miR-140-5p	miR-140/miR-876-3p/miR-140-5p	0.0172	4.644	TargetScan Human	High (predicted)	C15orf29	C15orf29	5.62e-05	-2.625
hsa-miR-140-5p	miR-140/miR-876-3p/miR-140-5p	0.0172	4.644	TargetScan Human	High (predicted)	CAMK2N1	CAMK2N1	8.3e-06	-2.36
hsa-miR-140-5p	miR-140/miR-876-3p/miR-140-5p	0.0172	4.644	TargetScan Human	High (predicted)	GNG12	GNG12	3.79e-05	-2.198	Actin Cytoskeleton Signaling,Androgen Signaling,Antiproliferative Role of Somatostatin Receptor 2,Axonal Guidance Signaling,Breast Cancer Regulation by Stathmin1,CCR3 Signaling in Eosinophils,CCR5 Signaling in Macrophages,CREB Signaling in Neurons
hsa-miR-140-5p	miR-140/miR-876-3p/miR-140-5p	0.0172	4.644	TargetScan Human	High (predicted)	KAT2B	KAT2B	0.00108	-2.151	AMPK Signaling,Androgen Signaling,Cell Cycle: G2/M DNA Damage Checkpoint Regulation,Estrogen Receptor Signaling,Glucocorticoid Receptor Signaling,HMGB1 Signaling,Lysine Degradation,RAR Activation
hsa-miR-140-5p	miR-140/miR-876-3p/miR-140-5p	0.0172	4.644	TargetScan Human	High (predicted)	MRPS10	MRPS10	0.00033	-2.242
hsa-miR-140-5p	miR-140/miR-876-3p/miR-140-5p	0.0172	4.644	TargetScan Human	High (predicted)	MYO6	MYO6	0.000321	-2.551	Clathrin-mediated Endocytosis Signaling
hsa-miR-140-5p	miR-140/miR-876-3p/miR-140-5p	0.0172	4.644	TargetScan Human	High (predicted)	PHACTR2	PHACTR2	4.74e-05	-4.488
hsa-miR-140-5p	miR-140/miR-876-3p/miR-140-5p	0.0172	4.644	TargetScan Human	High (predicted)	PPP1CB	PPP1CB	0.000776	-2.18	Actin Cytoskeleton Signaling,Breast Cancer Regulation by Stathmin1,CCR3 Signaling in Eosinophils,CDK5 Signaling,Cardiac β-adrenergic Signaling,Cdc42 Signaling,Cellular Effects of Sildenafil (Viagra),Chemokine Signaling
hsa-miR-140-5p	miR-140/miR-876-3p/miR-140-5p	0.0172	4.644	TargetScan Human	High (predicted)	PRDM1	PRDM1	0.000631	-2.592
hsa-miR-140-5p	miR-140/miR-876-3p/miR-140-5p	0.0172	4.644	TargetScan Human	High (predicted)	RALA	RALA	0.000698	-2.832	Cdc42 Signaling,Integrin Signaling,Molecular Mechanisms of Cancer,Pancreatic Adenocarcinoma Signaling,Phospholipase C Signaling
hsa-miR-140-5p	miR-140/miR-876-3p/miR-140-5p	0.0172	4.644	TargetScan Human	High (predicted)	RFFL	RFFL	0.000163	-2.025
hsa-miR-140-5p	miR-140/miR-876-3p/miR-140-5p	0.0172	4.644	TargetScan Human	High (predicted)	RIOK3	RIOK3	0.000376	-2.653
hsa-miR-140-5p	miR-140/miR-876-3p/miR-140-5p	0.0172	4.644	TargetScan Human	High (predicted)	RNF169	RNF169	0.000798	-2.004
hsa-miR-140-5p	miR-140/miR-876-3p/miR-140-5p	0.0172	4.644	TargetScan Human	High (predicted)	SNX16	SNX16	0.00123	-2.99
hsa-miR-140-5p	miR-140/miR-876-3p/miR-140-5p	0.0172	4.644	TargetScan Human	High (predicted)	STRADB	STRADB	4.78e-05	-3.877
hsa-miR-140-5p	miR-140/miR-876-3p/miR-140-5p	0.0172	4.644	TargetScan Human	High (predicted)	TSC22D2	TSC22D2	2.51e-05	-2.11
hsa-miR-502-3p	miR-501-3p/miR-500/miR-502-3p (includes others)	0.00195	4.622	TargetScan Human	High (predicted)	AIM1	AIM1 (includes EG:11630)	0.00048	-2.985
hsa-miR-502-3p	miR-501-3p/miR-500/miR-502-3p (includes others)	0.00195	4.622	TargetScan Human	High (predicted)	B4GALT5	B4GALT5	0.000258	-3.355	Keratan Sulfate Biosynthesis,N-Glycan Biosynthesis
hsa-miR-150	miR-150/miR-5127	0.00434	4.525	TargetScan Human	High (predicted)	ADIPOR2	ADIPOR2	0.000423	-2.348	PPARα/RXRα Activation,Type II Diabetes Mellitus Signaling
hsa-miR-150	miR-150/miR-5127	0.00434	4.525	TargetScan Human	High (predicted)	AIFM2	AIFM2	0.000362	-2.228
hsa-miR-150	miR-150/miR-5127	0.00434	4.525	TargetScan Human	High (predicted)	CAST	CAST	0.00115	-2.307
hsa-miR-150	miR-150/miR-5127	0.00434	4.525	TargetScan Human	High (predicted)	CNST	CNST	0.000207	-2.424
hsa-miR-150	miR-150/miR-5127	0.00434	4.525	TargetScan Human	High (predicted)	EREG	EREG	0.000144	-2.886	Neuregulin Signaling
hsa-miR-150	miR-150/miR-5127	0.00434	4.525	TargetScan Human	High (predicted)	C16orf63	FOPNL	0.00041	-2.199
hsa-miR-150	miR-150/miR-5127	0.00434	4.525	TargetScan Human	High (predicted)	MEGF9	MEGF9	9e-05	-2.078
hsa-miR-150	miR-150/miR-5127	0.00434	4.525	TargetScan Human	High (predicted)	PDIA6	PDIA6	0.000367	-3.014
hsa-miR-150	miR-150/miR-5127	0.00434	4.525	TargetScan Human	High (predicted)	SYNPO2L	SYNPO2L	0.000104	-3.627
hsa-miR-150	miR-150/miR-5127	0.00434	4.525	TargetScan Human	High (predicted)	TOM1	TOM1 (includes EG:10043)	6.27e-06	-2.672
hsa-miR-150	miR-150/miR-5127	0.00434	4.525	TargetScan Human	High (predicted)	TRPS1	TRPS1	0.000129	-2.391
hsa-miR-29a	miR-29b/miR-29c/miR-29a	0.00597	4.276	TargetScan Human	High (predicted)	AIM1	AIM1 (includes EG:11630)	0.00048	-2.985
hsa-miR-29a	miR-29b/miR-29c/miR-29a	0.00597	4.276	TargetScan Human	High (predicted)	AMFR	AMFR	2.64e-06	-3.134	Protein Ubiquitination Pathway
hsa-miR-29a	miR-29b/miR-29c/miR-29a	0.00597	4.276	TargetScan Human	High (predicted)	C20orf11	C20orf11	0.000159	-2.077
hsa-miR-29a	miR-29b/miR-29c/miR-29a	0.00597	4.276	TargetScan Human	High (predicted)	DSC2	DSC2	0.000471	-2.526
hsa-miR-29a	miR-29b/miR-29c/miR-29a	0.00597	4.276	TargetScan Human	High (predicted)	ELMO2	ELMO2	0.000697	-2.029	CXCR4 Signaling
hsa-miR-29a	miR-29b/miR-29c/miR-29a	0.00597	4.276	TargetScan Human	High (predicted)	EMP1	EMP1	0.000158	-4.01
hsa-miR-29a	miR-29b/miR-29c/miR-29a	0.00597	4.276	TargetScan Human	High (predicted)	GNG12	GNG12	3.79e-05	-2.198	Actin Cytoskeleton Signaling,Androgen Signaling,Antiproliferative Role of Somatostatin Receptor 2,Axonal Guidance Signaling,Breast Cancer Regulation by Stathmin1,CCR3 Signaling in Eosinophils,CCR5 Signaling in Macrophages,CREB Signaling in Neurons
hsa-miR-29a	miR-29b/miR-29c/miR-29a	0.00597	4.276	TargetScan Human	High (predicted)	GSTA4	GSTA4	0.000454	-2.227	Aryl Hydrocarbon Receptor Signaling,Glutathione Metabolism,LPS/IL-1 Mediated Inhibition of RXR Function,Metabolism of Xenobiotics by Cytochrome P450,NRF2-mediated Oxidative Stress Response,Xenobiotic Metabolism Signaling
hsa-miR-29a	miR-29b/miR-29c/miR-29a	0.00597	4.276	TargetScan Human	High (predicted)	IL1RAP	IL1RAP	7.96e-05	-2.101	Acute Phase Response Signaling,Hepatic Cholestasis,Hepatic Fibrosis / Hepatic Stellate Cell Activation,IL-1 Signaling,IL-10 Signaling,IL-6 Signaling,LPS/IL-1 Mediated Inhibition of RXR Function,LXR/RXR Activation
hsa-miR-29a	miR-29b/miR-29c/miR-29a	0.00597	4.276	TargetScan Human	High (predicted)	LYPLA1	LYPLA1	0.000774	-2.338	Fatty Acid Elongation in Mitochondria,Glycerophospholipid Metabolism,Phospholipid Degradation
hsa-miR-29a	miR-29b/miR-29c/miR-29a	0.00597	4.276	TargetScan Human	High (predicted)	MXD1	MXD1	0.00118	-3.956	Polyamine Regulation in Colon Cancer,VDR/RXR Activation
hsa-miR-29a	miR-29b/miR-29c/miR-29a	0.00597	4.276	TargetScan Human	High (predicted)	PHACTR2	PHACTR2	4.74e-05	-4.488
hsa-miR-29a	miR-29b/miR-29c/miR-29a	0.00597	4.276	TargetScan Human	High (predicted)	RIOK3	RIOK3	0.000376	-2.653
hsa-miR-29a	miR-29b/miR-29c/miR-29a	0.00597	4.276	TargetScan Human	High (predicted)	RIT1	RIT1 (includes EG:19769)	0.000663	-2.272
hsa-miR-29a	miR-29b/miR-29c/miR-29a	0.00597	4.276	TargetScan Human	High (predicted)	RNF169	RNF169	0.000798	-2.004
hsa-miR-29a	miR-29b/miR-29c/miR-29a	0.00597	4.276	TargetScan Human	High (predicted)	SNX24	SNX24	0.000173	-3.988
hsa-miR-29a	miR-29b/miR-29c/miR-29a	0.00597	4.276	TargetScan Human	High (predicted)	TIAM1	TIAM1	7.97e-05	-2.003	Actin Cytoskeleton Signaling,Rac Signaling,Tight Junction Signaling
hsa-miR-29a	miR-29b/miR-29c/miR-29a	0.00597	4.276	TargetScan Human	High (predicted)	TUBB2A	TUBB2A	0.000357	-4.192	14-3-3-mediated Signaling,Axonal Guidance Signaling,Breast Cancer Regulation by Stathmin1,Gap Junction Signaling,Germ Cell-Sertoli Cell Junction Signaling,Sertoli Cell-Sertoli Cell Junction Signaling
hsa-miR-29a	miR-29b/miR-29c/miR-29a	0.00597	4.276	TargetScan Human	High (predicted)	UNC13B	UNC13B	9.16e-05	-2.424
hsa-miR-29a	miR-29b/miR-29c/miR-29a	0.00597	4.276	TargetScan Human	High (predicted)	USP6NL	USP6NL	0.000135	-2.474	Macropinocytosis Signaling
hsa-miR-29a	miR-29b/miR-29c/miR-29a	0.00597	4.276	TargetScan Human	High (predicted)	WDR26	WDR26	0.000714	-2.567
hsa-miR-126	miR-126/miR-126-3p	0.0099	3.824	miRecords	Experimentally Observed	TOM1	TOM1 (includes EG:10043)	6.27e-06	-2.672
hsa-miR-342-3p	miR-342-3p	0.00185	3.221	TargetScan Human	High (predicted)	C20orf11	C20orf11	0.000159	-2.077
hsa-miR-342-3p	miR-342-3p	0.00185	3.221	TargetScan Human	High (predicted)	CAMK2N1	CAMK2N1	8.3e-06	-2.36
hsa-miR-342-3p	miR-342-3p	0.00185	3.221	TargetScan Human	High (predicted)	CPEB4	CPEB4	0.000924	-2.334
hsa-miR-342-3p	miR-342-3p	0.00185	3.221	TargetScan Human	High (predicted)	RMND5A	RMND5A	0.000414	-4.82
hsa-miR-342-3p	miR-342-3p	0.00185	3.221	TargetScan Human	High (predicted)	SYNPO2L	SYNPO2L	0.000104	-3.627
hsa-miR-342-3p	miR-342-3p	0.00185	3.221	TargetScan Human	High (predicted)	TIAM1	TIAM1	7.97e-05	-2.003	Actin Cytoskeleton Signaling,Rac Signaling,Tight Junction Signaling
hsa-miR-181a	miR-181a/miR-181b/miR-181d (includes others)	0.0118	3.187	TargetScan Human	High (predicted)	ABTB2	ABTB2	3.92e-05	-2.69
hsa-miR-181a	miR-181a/miR-181b/miR-181d (includes others)	0.0118	3.187	TargetScan Human	High (predicted)	B4GALT1	B4GALT1	0.000986	-2.59	Galactose Metabolism,Keratan Sulfate Biosynthesis,N-Glycan Biosynthesis
hsa-miR-181a	miR-181a/miR-181b/miR-181d (includes others)	0.0118	3.187	TargetScan Human	High (predicted)	C12orf29	C12orf29	0.000733	-3.125
hsa-miR-181a	miR-181a/miR-181b/miR-181d (includes others)	0.0118	3.187	TargetScan Human	High (predicted)	C15orf29	C15orf29	5.62e-05	-2.625
hsa-miR-181a	miR-181a/miR-181b/miR-181d (includes others)	0.0118	3.187	TargetScan Human	High (predicted)	CCDC6	CCDC6	1.88e-05	-2.379
hsa-miR-181a	miR-181a/miR-181b/miR-181d (includes others)	0.0118	3.187	TargetScan Human	High (predicted)	CHMP2B	CHMP2B	0.000838	-2.682	Mechanisms of Viral Exit from Host Cells
hsa-miR-181a	miR-181a/miR-181b/miR-181d (includes others)	0.0118	3.187	TargetScan Human	High (predicted)	CPEB4	CPEB4	0.000924	-2.334
hsa-miR-181a	miR-181a/miR-181b/miR-181d (includes others)	0.0118	3.187	TargetScan Human	High (predicted)	CTTNBP2NL	CTTNBP2NL	0.000604	-2.077
hsa-miR-181a	miR-181a/miR-181b/miR-181d (includes others)	0.0118	3.187	TargetScan Human	High (predicted)	EREG	EREG	0.000144	-2.886	Neuregulin Signaling
hsa-miR-181a	miR-181a/miR-181b/miR-181d (includes others)	0.0118	3.187	TargetScan Human	High (predicted)	FBXO34	FBXO34	0.000227	-2.804
hsa-miR-181a	miR-181a/miR-181b/miR-181d (includes others)	0.0118	3.187	TargetScan Human	High (predicted)	IGF2BP3	IGF2BP3	0.000996	-2.184
hsa-miR-181a	miR-181a/miR-181b/miR-181d (includes others)	0.0118	3.187	TargetScan Human	High (predicted)	MEGF9	MEGF9	9e-05	-2.078
hsa-miR-181a	miR-181a/miR-181b/miR-181d (includes others)	0.0118	3.187	TargetScan Human	High (predicted)	MOSPD1	MOSPD1	0.000356	-3.24
hsa-miR-181a	miR-181a/miR-181b/miR-181d (includes others)	0.0118	3.187	TargetScan Human	High (predicted)	NPEPPS	NPEPPS	0.000103	-2.715
hsa-miR-181a	miR-181a/miR-181b/miR-181d (includes others)	0.0118	3.187	TargetScan Human	High (predicted)	PHACTR2	PHACTR2	4.74e-05	-4.488
hsa-miR-181a	miR-181a/miR-181b/miR-181d (includes others)	0.0118	3.187	TargetScan Human	High (predicted)	PHACTR4	PHACTR4	0.000498	-2.893
hsa-miR-181a	miR-181a/miR-181b/miR-181d (includes others)	0.0118	3.187	TargetScan Human	High (predicted)	PHLDA1	PHLDA1	0.000278	-3.297
hsa-miR-181a	miR-181a/miR-181b/miR-181d (includes others)	0.0118	3.187	TargetScan Human	High (predicted)	PI4K2A	PI4K2A	0.000469	-2.061	Inositol Phosphate Metabolism
hsa-miR-181a	miR-181a/miR-181b/miR-181d (includes others)	0.0118	3.187	TargetScan Human	High (predicted)	PPP1CB	PPP1CB	0.000776	-2.18	Actin Cytoskeleton Signaling,Breast Cancer Regulation by Stathmin1,CCR3 Signaling in Eosinophils,CDK5 Signaling,Cardiac β-adrenergic Signaling,Cdc42 Signaling,Cellular Effects of Sildenafil (Viagra),Chemokine Signaling
hsa-miR-181a	miR-181a/miR-181b/miR-181d (includes others)	0.0118	3.187	TargetScan Human	High (predicted)	PRDM1	PRDM1	0.000631	-2.592
hsa-miR-181a	miR-181a/miR-181b/miR-181d (includes others)	0.0118	3.187	TargetScan Human	High (predicted)	RALA	RALA	0.000698	-2.832	Cdc42 Signaling,Integrin Signaling,Molecular Mechanisms of Cancer,Pancreatic Adenocarcinoma Signaling,Phospholipase C Signaling
hsa-miR-181a	miR-181a/miR-181b/miR-181d (includes others)	0.0118	3.187	TargetScan Human	High (predicted)	RAP2A	RAP2A	1.09e-05	-2.399	Calcium Signaling,Integrin Signaling,Molecular Mechanisms of Cancer
hsa-miR-181a	miR-181a/miR-181b/miR-181d (includes others)	0.0118	3.187	TargetScan Human	High (predicted)	RNF169	RNF169	0.000798	-2.004
hsa-miR-181a	miR-181a/miR-181b/miR-181d (includes others)	0.0118	3.187	TargetScan Human	High (predicted)	SASH1	SASH1	0.000247	-3.585
hsa-miR-181a	miR-181a/miR-181b/miR-181d (includes others)	0.0118	3.187	TargetScan Human	High (predicted)	SRGAP1	SRGAP1	0.000434	-3.206	Axonal Guidance Signaling
hsa-miR-181a	miR-181a/miR-181b/miR-181d (includes others)	0.0118	3.187	TargetScan Human	High (predicted)	TAB3	TAB3	9.2e-07	-2.083	NF-κB Signaling
hsa-miR-181a	miR-181a/miR-181b/miR-181d (includes others)	0.0118	3.187	TargetScan Human	High (predicted)	TOR1AIP2	TOR1AIP2	4.9e-05	-2.282
hsa-miR-181a	miR-181a/miR-181b/miR-181d (includes others)	0.0118	3.187	TargetScan Human	High (predicted)	TSC22D2	TSC22D2	2.51e-05	-2.11
hsa-miR-181a	miR-181a/miR-181b/miR-181d (includes others)	0.0118	3.187	TargetScan Human	High (predicted)	UBL3	UBL3	0.000443	-2.899
hsa-miR-181a	miR-181a/miR-181b/miR-181d (includes others)	0.0118	3.187	TargetScan Human	High (predicted)	USP6NL	USP6NL	0.000135	-2.474	Macropinocytosis Signaling
hsa-miR-181a	miR-181a/miR-181b/miR-181d (includes others)	0.0118	3.187	TargetScan Human	High (predicted)	WNK1	WNK1	5.16e-06	-2.81	ERK5 Signaling
hsa-miR-181a	miR-181a/miR-181b/miR-181d (includes others)	0.0118	3.187	TargetScan Human	High (predicted)	ZFAND5	ZFAND5	0.000282	-2.78
hsa-miR-181a	miR-181a/miR-181b/miR-181d (includes others)	0.0118	3.187	TargetScan Human	High (predicted)	ZNF823	ZNF823	5.34e-05	-2.18
hsa-miR-93	miR-20a/miR-106b/miR-17-5p (includes others)	0.0186	2.948	TargetScan Human	High (predicted)	ADIPOR2	ADIPOR2	0.000423	-2.348	PPARα/RXRα Activation,Type II Diabetes Mellitus Signaling
hsa-miR-93	miR-20a/miR-106b/miR-17-5p (includes others)	0.0186	2.948	TargetScan Human	High (predicted)	C1orf9	C1orf9	0.000449	-2.003
hsa-miR-93	miR-20a/miR-106b/miR-17-5p (includes others)	0.0186	2.948	TargetScan Human	High (predicted)	CAMK2N1	CAMK2N1	8.3e-06	-2.36
hsa-miR-93	miR-20a/miR-106b/miR-17-5p (includes others)	0.0186	2.948	TargetScan Human	High (predicted)	CCNG2	CCNG2	0.000228	-2.181
hsa-miR-93	miR-20a/miR-106b/miR-17-5p (includes others)	0.0186	2.948	TargetScan Human	High (predicted)	CLOCK	CLOCK	0.000892	-2.62	Circadian Rhythm Signaling,PPARα/RXRα Activation
hsa-miR-93	miR-20a/miR-106b/miR-17-5p (includes others)	0.0186	2.948	TargetScan Human	High (predicted)	CYP4F3	CYP4F3	1.23e-05	-2.326	Arachidonic Acid Metabolism
hsa-miR-93	miR-20a/miR-106b/miR-17-5p (includes others)	0.0186	2.948	TargetScan Human	High (predicted)	EREG	EREG	0.000144	-2.886	Neuregulin Signaling
hsa-miR-93	miR-20a/miR-106b/miR-17-5p (includes others)	0.0186	2.948	TargetScan Human	High (predicted)	FAM45A	FAM45A	0.000212	-2.526
hsa-miR-93	miR-20a/miR-106b/miR-17-5p (includes others)	0.0186	2.948	TargetScan Human	High (predicted)	HIF1A	HIF1A	0.000203	-3.449	HIF1α Signaling,Hypoxia Signaling in the Cardiovascular System,ILK Signaling,Molecular Mechanisms of Cancer,Renal Cell Carcinoma Signaling,TR/RXR Activation,VEGF Signaling,mTOR Signaling
hsa-miR-93	miR-20a/miR-106b/miR-17-5p (includes others)	0.0186	2.948	TarBase,miRecords	Experimentally Observed	HIPK3	HIPK3	0.000357	-2.032
hsa-miR-93	miR-20a/miR-106b/miR-17-5p (includes others)	0.0186	2.948	TargetScan Human	High (predicted)	IL1RAP	IL1RAP	7.96e-05	-2.101	Acute Phase Response Signaling,Hepatic Cholestasis,Hepatic Fibrosis / Hepatic Stellate Cell Activation,IL-1 Signaling,IL-10 Signaling,IL-6 Signaling,LPS/IL-1 Mediated Inhibition of RXR Function,LXR/RXR Activation
hsa-miR-93	miR-20a/miR-106b/miR-17-5p (includes others)	0.0186	2.948	TargetScan Human	High (predicted)	KAT2B	KAT2B	0.00108	-2.151	AMPK Signaling,Androgen Signaling,Cell Cycle: G2/M DNA Damage Checkpoint Regulation,Estrogen Receptor Signaling,Glucocorticoid Receptor Signaling,HMGB1 Signaling,Lysine Degradation,RAR Activation
hsa-miR-93	miR-20a/miR-106b/miR-17-5p (includes others)	0.0186	2.948	TargetScan Human	High (predicted)	KIAA0232	KIAA0232	0.000209	-2.613
hsa-miR-93	miR-20a/miR-106b/miR-17-5p (includes others)	0.0186	2.948	TargetScan Human	High (predicted)	MGLL	MGLL	6.76e-07	-3.001	Glycerolipid Metabolism,Glycerophospholipid Metabolism,Phospholipid Degradation
hsa-miR-93	miR-20a/miR-106b/miR-17-5p (includes others)	0.0186	2.948	TargetScan Human	High (predicted)	SC4MOL	MSMO1	0.000226	-3.329
hsa-miR-93	miR-20a/miR-106b/miR-17-5p (includes others)	0.0186	2.948	TargetScan Human	High (predicted)	MXD1	MXD1	0.00118	-3.956	Polyamine Regulation in Colon Cancer,VDR/RXR Activation
hsa-miR-93	miR-20a/miR-106b/miR-17-5p (includes others)	0.0186	2.948	TargetScan Human	High (predicted)	NPAS2	NPAS2	8.65e-05	-3.579
hsa-miR-93	miR-20a/miR-106b/miR-17-5p (includes others)	0.0186	2.948	TargetScan Human	High (predicted)	PFKFB3	PFKFB3	7.56e-05	-2.84	AMPK Signaling,Fructose and Mannose Metabolism
hsa-miR-93	miR-20a/miR-106b/miR-17-5p (includes others)	0.0186	2.948	TargetScan Human	High (predicted)	PLEKHM1	PLEKHM1	0.000246	-2.69
hsa-miR-93	miR-20a/miR-106b/miR-17-5p (includes others)	0.0186	2.948	TargetScan Human	High (predicted)	PTPN3	PTPN3	0.0012	-2.244
hsa-miR-93	miR-20a/miR-106b/miR-17-5p (includes others)	0.0186	2.948	TargetScan Human	High (predicted)	RAB5B	RAB5B	0.000767	-2.099	Amyotrophic Lateral Sclerosis Signaling,Caveolar-mediated Endocytosis Signaling,Clathrin-mediated Endocytosis Signaling
hsa-miR-93	miR-20a/miR-106b/miR-17-5p (includes others)	0.0186	2.948	TargetScan Human	High (predicted)	RNF11	RNF11	0.000866	-2.322
hsa-miR-93	miR-20a/miR-106b/miR-17-5p (includes others)	0.0186	2.948	TargetScan Human	High (predicted)	SASH1	SASH1	0.000247	-3.585
hsa-miR-93	miR-20a/miR-106b/miR-17-5p (includes others)	0.0186	2.948	TargetScan Human	High (predicted)	SLC16A9	SLC16A9	0.000173	-3.36
hsa-miR-93	miR-20a/miR-106b/miR-17-5p (includes others)	0.0186	2.948	TargetScan Human	High (predicted)	SNX16	SNX16	0.00123	-2.99
hsa-miR-93	miR-20a/miR-106b/miR-17-5p (includes others)	0.0186	2.948	TargetScan Human	High (predicted)	SNX9	SNX9	7.01e-06	-3.303	Clathrin-mediated Endocytosis Signaling
hsa-miR-93	miR-20a/miR-106b/miR-17-5p (includes others)	0.0186	2.948	TargetScan Human	High (predicted)	TIAM1	TIAM1	7.97e-05	-2.003	Actin Cytoskeleton Signaling,Rac Signaling,Tight Junction Signaling
hsa-miR-93	miR-20a/miR-106b/miR-17-5p (includes others)	0.0186	2.948	TargetScan Human	High (predicted)	TRIP10	TRIP10	0.00049	-2.922	Insulin Receptor Signaling
hsa-miR-93	miR-20a/miR-106b/miR-17-5p (includes others)	0.0186	2.948	TargetScan Human	High (predicted)	TRPS1	TRPS1	0.000129	-2.391
hsa-miR-93	miR-20a/miR-106b/miR-17-5p (includes others)	0.0186	2.948	TargetScan Human	High (predicted)	TSC22D2	TSC22D2	2.51e-05	-2.11
hsa-miR-93	miR-20a/miR-106b/miR-17-5p (includes others)	0.0186	2.948	TargetScan Human	High (predicted)	TWF1	TWF1 (includes EG:19230)	0.000395	-2.028	IL-15 Production
hsa-miR-93	miR-20a/miR-106b/miR-17-5p (includes others)	0.0186	2.948	TargetScan Human	High (predicted)	WNK1	WNK1	5.16e-06	-2.81	ERK5 Signaling
hsa-miR-27a	miR-27b/miR-27a	0.0038	2.936	TargetScan Human	High (predicted)	BNIP3	BNIP3	0.000231	-5.576
hsa-miR-27a	miR-27b/miR-27a	0.0038	2.936	TargetScan Human	High (predicted)	C15orf29	C15orf29	5.62e-05	-2.625
hsa-miR-27a	miR-27b/miR-27a	0.0038	2.936	TargetScan Human	High (predicted)	C1orf9	C1orf9	0.000449	-2.003
hsa-miR-27a	miR-27b/miR-27a	0.0038	2.936	TargetScan Human	High (predicted)	CAB39L	CAB39L	8.21e-05	-3.626
hsa-miR-27a	miR-27b/miR-27a	0.0038	2.936	TargetScan Human	High (predicted)	CCNYL1	CCNYL1	7.22e-06	-3.991
hsa-miR-27a	miR-27b/miR-27a	0.0038	2.936	TargetScan Human	High (predicted)	CDS1	CDS1	0.000287	-2.404	Aminophosphonate Metabolism,Glycerophospholipid Metabolism
hsa-miR-27a	miR-27b/miR-27a	0.0038	2.936	TargetScan Human	High (predicted)	CNN3	CNN3	0.00064	-3.085
hsa-miR-27a	miR-27b/miR-27a	0.0038	2.936	TargetScan Human	High (predicted)	CPEB4	CPEB4	0.000924	-2.334
hsa-miR-27a	miR-27b/miR-27a	0.0038	2.936	TargetScan Human	High (predicted)	CPPED1	CPPED1	0.000959	-3.533
hsa-miR-27a	miR-27b/miR-27a	0.0038	2.936	TargetScan Human	High (predicted)	CRISP2	CRISP2	0.000186	-4.79
hsa-miR-27a	miR-27b/miR-27a	0.0038	2.936	TargetScan Human	High (predicted)	ENDOU	ENDOU	5.24e-06	-6.936
hsa-miR-27a	miR-27b/miR-27a	0.0038	2.936	TargetScan Human	High (predicted)	EPB41L4A	EPB41L4A	1.74e-06	-2.153
hsa-miR-27a	miR-27b/miR-27a	0.0038	2.936	TargetScan Human	High (predicted)	GLTP	GLTP	0.000125	-2.096
hsa-miR-27a	miR-27b/miR-27a	0.0038	2.936	TargetScan Human	High (predicted)	GNG12	GNG12	3.79e-05	-2.198	Actin Cytoskeleton Signaling,Androgen Signaling,Antiproliferative Role of Somatostatin Receptor 2,Axonal Guidance Signaling,Breast Cancer Regulation by Stathmin1,CCR3 Signaling in Eosinophils,CCR5 Signaling in Macrophages,CREB Signaling in Neurons
hsa-miR-27a	miR-27b/miR-27a	0.0038	2.936	TargetScan Human	High (predicted)	IL1RAP	IL1RAP	7.96e-05	-2.101	Acute Phase Response Signaling,Hepatic Cholestasis,Hepatic Fibrosis / Hepatic Stellate Cell Activation,IL-1 Signaling,IL-10 Signaling,IL-6 Signaling,LPS/IL-1 Mediated Inhibition of RXR Function,LXR/RXR Activation
hsa-miR-27a	miR-27b/miR-27a	0.0038	2.936	TargetScan Human	High (predicted)	LPIN1	LPIN1	6.35e-05	-4.6	Glycerolipid Metabolism,Glycerophospholipid Metabolism,Phospholipid Degradation,Sphingolipid Metabolism
hsa-miR-27a	miR-27b/miR-27a	0.0038	2.936	TargetScan Human	High (predicted)	MARCH5	MARCH5	0.000956	-2.142
hsa-miR-27a	miR-27b/miR-27a	0.0038	2.936	TargetScan Human	High (predicted)	NCOA1	NCOA1	0.000435	-2.563	Androgen Signaling,Estrogen Receptor Signaling,Glucocorticoid Receptor Signaling,HIF1α Signaling,IL-12 Signaling and Production in Macrophages,PPAR Signaling,PXR/RXR Activation,RAR Activation
hsa-miR-27a	miR-27b/miR-27a	0.0038	2.936	TargetScan Human	High (predicted)	NPEPPS	NPEPPS	0.000103	-2.715
hsa-miR-27a	miR-27b/miR-27a	0.0038	2.936	TargetScan Human	High (predicted)	PLEKHA6	PLEKHA6	0.000126	-2.06
hsa-miR-27a	miR-27b/miR-27a	0.0038	2.936	TargetScan Human	High (predicted)	PTPN3	PTPN3	0.0012	-2.244
hsa-miR-27a	miR-27b/miR-27a	0.0038	2.936	TargetScan Human	High (predicted)	RIT1	RIT1 (includes EG:19769)	0.000663	-2.272
hsa-miR-27a	miR-27b/miR-27a	0.0038	2.936	TargetScan Human	High (predicted)	RMND5A	RMND5A	0.000414	-4.82
hsa-miR-27a	miR-27b/miR-27a	0.0038	2.936	TargetScan Human	High (predicted)	STK39	STK39	0.0011	-2.083
hsa-miR-27a	miR-27b/miR-27a	0.0038	2.936	TargetScan Human	High (predicted)	TAB3	TAB3	9.2e-07	-2.083	NF-κB Signaling
hsa-miR-27a	miR-27b/miR-27a	0.0038	2.936	TargetScan Human	High (predicted)	TSC22D2	TSC22D2	2.51e-05	-2.11
hsa-miR-27a	miR-27b/miR-27a	0.0038	2.936	TargetScan Human	High (predicted)	WNK1	WNK1	5.16e-06	-2.81	ERK5 Signaling
hsa-miR-152	miR-152/miR-148b/miR-148a (includes others)	0.00575	2.874	TargetScan Human	High (predicted)	B4GALT5	B4GALT5	0.000258	-3.355	Keratan Sulfate Biosynthesis,N-Glycan Biosynthesis
hsa-miR-152	miR-152/miR-148b/miR-148a (includes others)	0.00575	2.874	TargetScan Human	High (predicted)	C18orf25	C18orf25	0.000632	-2.861
hsa-miR-152	miR-152/miR-148b/miR-148a (includes others)	0.00575	2.874	TargetScan Human	High (predicted)	CAST	CAST	0.00115	-2.307
hsa-miR-152	miR-152/miR-148b/miR-148a (includes others)	0.00575	2.874	TargetScan Human	High (predicted)	CCDC6	CCDC6	1.88e-05	-2.379
hsa-miR-152	miR-152/miR-148b/miR-148a (includes others)	0.00575	2.874	TargetScan Human	High (predicted)	CLOCK	CLOCK	0.000892	-2.62	Circadian Rhythm Signaling,PPARα/RXRα Activation
hsa-miR-152	miR-152/miR-148b/miR-148a (includes others)	0.00575	2.874	TargetScan Human	High (predicted)	CPEB4	CPEB4	0.000924	-2.334
hsa-miR-152	miR-152/miR-148b/miR-148a (includes others)	0.00575	2.874	TargetScan Human	High (predicted)	DSC2	DSC2	0.000471	-2.526
hsa-miR-152	miR-152/miR-148b/miR-148a (includes others)	0.00575	2.874	TargetScan Human	High (predicted)	EMP1	EMP1	0.000158	-4.01
hsa-miR-152	miR-152/miR-148b/miR-148a (includes others)	0.00575	2.874	TargetScan Human	High (predicted)	KIAA0232	KIAA0232	0.000209	-2.613
hsa-miR-152	miR-152/miR-148b/miR-148a (includes others)	0.00575	2.874	TargetScan Human	High (predicted)	MOSPD1	MOSPD1	0.000356	-3.24
hsa-miR-152	miR-152/miR-148b/miR-148a (includes others)	0.00575	2.874	TargetScan Human	High (predicted)	MXD1	MXD1	0.00118	-3.956	Polyamine Regulation in Colon Cancer,VDR/RXR Activation
hsa-miR-152	miR-152/miR-148b/miR-148a (includes others)	0.00575	2.874	TargetScan Human	High (predicted)	NCOA1	NCOA1	0.000435	-2.563	Androgen Signaling,Estrogen Receptor Signaling,Glucocorticoid Receptor Signaling,HIF1α Signaling,IL-12 Signaling and Production in Macrophages,PPAR Signaling,PXR/RXR Activation,RAR Activation
hsa-miR-152	miR-152/miR-148b/miR-148a (includes others)	0.00575	2.874	TargetScan Human	High (predicted)	PHACTR2	PHACTR2	4.74e-05	-4.488
hsa-miR-152	miR-152/miR-148b/miR-148a (includes others)	0.00575	2.874	TargetScan Human	High (predicted)	PPP1CB	PPP1CB	0.000776	-2.18	Actin Cytoskeleton Signaling,Breast Cancer Regulation by Stathmin1,CCR3 Signaling in Eosinophils,CDK5 Signaling,Cardiac β-adrenergic Signaling,Cdc42 Signaling,Cellular Effects of Sildenafil (Viagra),Chemokine Signaling
hsa-miR-152	miR-152/miR-148b/miR-148a (includes others)	0.00575	2.874	TargetScan Human	High (predicted)	RMND5A	RMND5A	0.000414	-4.82
hsa-miR-152	miR-152/miR-148b/miR-148a (includes others)	0.00575	2.874	TargetScan Human	High (predicted)	SECISBP2L	SECISBP2L	0.00101	-2.234
hsa-miR-152	miR-152/miR-148b/miR-148a (includes others)	0.00575	2.874	TargetScan Human	High (predicted)	STRADB	STRADB	4.78e-05	-3.877
hsa-miR-152	miR-152/miR-148b/miR-148a (includes others)	0.00575	2.874	TargetScan Human	High (predicted)	TRPS1	TRPS1	0.000129	-2.391
hsa-miR-152	miR-152/miR-148b/miR-148a (includes others)	0.00575	2.874	TargetScan Human	High (predicted)	WASL	WASL	0.000247	-2.121	Actin Cytoskeleton Signaling,Actin Nucleation by ARP-WASP Complex,Axonal Guidance Signaling,Cdc42 Signaling,Clathrin-mediated Endocytosis Signaling,Ephrin Receptor Signaling,Germ Cell-Sertoli Cell Junction Signaling,Integrin Signaling
hsa-miR-222	miR-222/miR-221/miR-1928	0.0261	1.849	TargetScan Human	High (predicted)	C18orf25	C18orf25	0.000632	-2.861
hsa-miR-222	miR-222/miR-221/miR-1928	0.0261	1.849	TargetScan Human	High (predicted)	INPP4B	INPP4B	0.00014	-2.836	Inositol Phosphate Metabolism
hsa-miR-222	miR-222/miR-221/miR-1928	0.0261	1.849	TargetScan Human	High (predicted)	KIAA1370	KIAA1370	0.00038	-2.405
hsa-miR-222	miR-222/miR-221/miR-1928	0.0261	1.849	TargetScan Human	High (predicted)	LYPLA1	LYPLA1	0.000774	-2.338	Fatty Acid Elongation in Mitochondria,Glycerophospholipid Metabolism,Phospholipid Degradation
hsa-miR-222	miR-222/miR-221/miR-1928	0.0261	1.849	TargetScan Human	High (predicted)	MEGF9	MEGF9	9e-05	-2.078
hsa-miR-222	miR-222/miR-221/miR-1928	0.0261	1.849	TargetScan Human	High (predicted)	PHACTR4	PHACTR4	0.000498	-2.893
hsa-miR-222	miR-222/miR-221/miR-1928	0.0261	1.849	TargetScan Human	High (predicted)	TIPARP	TIPARP	0.000461	-2.165	Retinoic acid Mediated Apoptosis Signaling
hsa-miR-222	miR-222/miR-221/miR-1928	0.0261	1.849	TargetScan Human	High (predicted)	TP53BP2	TP53BP2	0.00115	-2.133	p53 Signaling
hsa-miR-222	miR-222/miR-221/miR-1928	0.0261	1.849	TargetScan Human	High (predicted)	TRPS1	TRPS1	0.000129	-2.391
hsa-miR-222	miR-222/miR-221/miR-1928	0.0261	1.849	TargetScan Human	High (predicted)	ZFAND5	ZFAND5	0.000282	-2.78
hsa-miR-155	miR-155 (human, mouse)	0.0354	1.581	TargetScan Human	High (predicted)	CAB39	CAB39	0.000631	-2.296	AMPK Signaling
hsa-miR-155	miR-155 (human, mouse)	0.0354	1.581	TargetScan Human	High (predicted)	ETNK2	ETNK2	7.72e-05	-4.884
hsa-miR-155	miR-155 (human, mouse)	0.0354	1.581	Ingenuity Expert Findings	Experimentally Observed	IL13RA1	IL13RA1	0.00101	-2.003	IL-4 Signaling
hsa-miR-155	miR-155 (human, mouse)	0.0354	1.581	TargetScan Human	High (predicted)	PEA15	PEA15	0.00073	-2.175
hsa-miR-155	miR-155 (human, mouse)	0.0354	1.581	TarBase	Experimentally Observed	PPL	PPL	0.000449	-2.953
hsa-miR-155	miR-155 (human, mouse)	0.0354	1.581	TargetScan Human	High (predicted)	PTN	PTN	0.000475	-2.12
hsa-miR-155	miR-155 (human, mouse)	0.0354	1.581	TargetScan Human	High (predicted)	TRPS1	TRPS1	0.000129	-2.391
hsa-miR-155	miR-155 (human, mouse)	0.0354	1.581	TargetScan Human	High (predicted)	TWF1	TWF1 (includes EG:19230)	0.000395	-2.028	IL-15 Production
hsa-miR-155	miR-155 (human, mouse)	0.0354	1.581	TargetScan Human	High (predicted)	WNK1	WNK1	5.16e-06	-2.81	ERK5 Signaling
hsa-miR-155	miR-155 (human, mouse)	0.0354	1.581	TargetScan Human	High (predicted)	ZNF431	ZNF431	5.69e-05	-2.962
hsa-miR-155	miR-155 (human, mouse)	0.0354	1.581	TargetScan Human	High (predicted)	ZNF714	ZNF714	0.000949	-2.077
hsa-miR-147	miR-147	0.00642	-2.454	TargetScan Human	High (predicted)	CYP2S1	CYP2S1	0.000176	2.027	Arachidonic Acid Metabolism,Fatty Acid Metabolism,Linoleic Acid Metabolism,Metabolism of Xenobiotics by Cytochrome P450,Tryptophan Metabolism
hsa-miR-203	miR-203	0.0355	-2.68	TargetScan Human	High (predicted)	ALOX15	ALOX15	0.00115	10.299	Arachidonic Acid Metabolism,Atherosclerosis Signaling,Docosahexaenoic Acid (DHA) Signaling,Eicosanoid Signaling,IL-12 Signaling and Production in Macrophages,Linoleic Acid Metabolism
